# Supplementary material for: Variations in airborne bacterial communities at high altitudes overthe Noto Peninsula (Japan) in response to Asian dust events
Source: Copernicus journal article supplement (doi:10.5194/acp-2016-1095), 2017-01-25
Supplement: Supplementary file [file acp-2016-1095-AC2-supplement.pdf]

1 Title:

2 **Variations in airborne bacterial communities at high altitudes over the Noto**  
3 **Peninsula (Japan) in response to Asian dust events**

4

5 Authors:

6 Teruya Maki <sup>\*a</sup>, Kazutaka Hara<sup>b</sup>, Ayumu Iwata<sup>c</sup>, Kevin C. Lee<sup>d</sup>, Kei Kawai<sup>e</sup>, Kenji Kai<sup>e</sup>,  
7 Fumihisa Kobayashi<sup>f</sup>, Stephen B. Pointing<sup>d</sup>, Stephen Archer<sup>d</sup>, Hiroshi Hasegawa<sup>a</sup>, and  
8 Yasunobu Iwasaka<sup>g</sup>

9

10 Author Affiliations:

11 <sup>a</sup> College of Science and Engineering, Kanazawa University, Kakuma, Kanazawa,  
12 Ishikawa, 920-1192, Japan.

13 <sup>b</sup> National Institute for Environmental Studies, Tsukuba, Ibaraki 305-8506, Japan.

14 <sup>c</sup> Graduate school of Natural Science and Technology, Kanazawa University, Kakuma,  
15 Ishikawa, 920-1192, Japan.

16 <sup>d</sup> School of Applied Sciences, Auckland University of Technology, Private Bag 92006,  
17 Auckland 1142, New Zealand.

18 <sup>e</sup> Graduate School of Environmental Studies, Nagoya University; Furocho, Chikusaku,  
19 Nagoya, 464-8601, Japan.

20 <sup>f</sup> Graduate School of Science and Technology, Hirosaki University, Bunkyo-cho 3,  
21 Hirosaki, Aomori, 036-8561, Japan.

22 <sup>g</sup> Community Research Service Group, University of Shiga Prefecture, 2500  
23 Yasakamachi, Hikoneshi, Shiga, 522-8533, Japan.

24

25 \*Corresponding author:

26 Tel: +81-(0) 76-234-4793, Fax: +81-(0) 76-234-4800

27 E-mail: [makiteru@se.kanazawa-u.ac.jp](mailto:makiteru@se.kanazawa-u.ac.jp)

## 28 **1. Introduction**

29 Airborne microorganisms (bioaerosols) associated with desert-sand and  
30 anthropogenic particles were transported through free troposphere from the Asian  
31 continents to downwind regions of East Asia and can influence climate changes,  
32 ecosystem dynamics, and human health (Iwasaka et al., 2009). Natural dust events from  
33 the Asian desert regions carry airborne microorganisms, supporting atmospheric  
34 microbial dispersals (Griffin et al., 2007; Maki et al., 2010; Pointing and Belnap, 2014).  
35 Haze days caused by anthropogenic particles from Asian continents also affect airborne  
36 microbial abundance and endotoxin levels (Wei et al., 2016). Some studies  
37 demonstrated that Asian dust events, including natural and anthropogenic particles,  
38 cause vertical mixture of bioaerosols in downwind areas, such as in Japan (Huang et al.,  
39 2015b; Sugimoto et al., 2012; Maki et al., 2015).

40 Bioaerosols, which include bacteria, fungi, and viruses, are transported from  
41 ground environments to the free troposphere and account for a substantial proportion of  
42 organic aerosols (Jaenicke, 2005). Bioaerosols are thought to influence atmospheric  
43 processes by participating in atmospheric chemical reactions and in the formation of  
44 cloud-nucleating particles (Pratt et al., 2009; Morris et al., 2011; Hara et al., 2016b).  
45 Indeed, airborne microorganisms act as ice nuclei that are related to ice-cloud formation  
46 processes (Möhler et al., 2007; Delort et al., 2010; Creamean et al., 2013; Joly et al.,  
47 2013). In particular, ice-nucleation activating proteins of some microorganisms, such as  
48 *Pseudomonas syringae*, *Xanthomonas campestris* and *Erwinia herbicola*, exhibit high  
49 nucleation activities, initiating ice formation at relatively warm temperatures (greater  
50 than -5 °C) (Morris et al. 2004) in comparison to the inorganic ice-nucleating particles,

51 such as potassium feldspar (approximately -8 °C) (Atkinson et al. 2013). Ice-nucleating  
52 particles that originate from bioaerosols are believed to activate ice formation more  
53 efficiently than inorganic substances (Hoose and Möhler, 2012; Murray et al. 2012), and  
54 are primary contributors of rapid ice-cloud formation even at low concentrations in the  
55 clouds at temperatures between -8 °C and -3 °C (Hallett and Mossop, 1974).  
56 Bioaerosols are key factors for elucidating the detailed mechanisms of ice-cloud  
57 formation and precipitation over East Asia (Hara et al., 2016ab), but the microbial  
58 characteristics of bioaerosols transported over long distances by Asian-dust events are  
59 still unclear. Furthermore, the microorganisms transported by Asian dust events increase  
60 the allergenic burden, consequently inducing asthma incidences (Ichinose et al., 2005)  
61 and contributing to the dispersal of diseases such as Kawasaki disease (Rodó et al.,  
62 2011) and rust diseases (Brown and Hovmøller, 2002).

63 In downwind areas of East Asia, the atmospheric bacterial dynamics at high  
64 altitudes should be investigated in order to understand the ecological and meteorological  
65 influences of airborne bacteria as well as their long-range dispersion. Meteorological  
66 shifts and dust events can dramatically alter airborne bacterial communities at high  
67 altitudes in Japan (Maki et al., 2013 and 2015) because of air masses that originate from  
68 heterogeneous environments, including marine, mountainous, urban, and desert areas.  
69 The airborne microorganisms around North American mountains (2,700 m above sea  
70 level) were also found to increase their species diversities in response to Asian dust  
71 events (Smith et al., 2013). High-throughput sequencing technology can generate large  
72 numbers of nucleotide sequences and the sequencing database has played an important  
73 role for investigation of airborne bacterial compositions (Brodie et al., 2007; Woo et al.,

74 2013). Indeed, the analyses using high-throughput sequencing has demonstrated that  
75 airborne bacterial populations at ground levels change in response to pollutants from  
76 Beijing (Cao et al., 2014) and African dust events (Mazar et al., 2016). To investigate  
77 their long-range transported bacteria while avoiding the ground-surface contaminations,  
78 the bioaerosol samples collected at high altitudes by aircrafts were analyzed using  
79 high-throughput sequencing, showing the airborne microbial diversities at high altitudes,  
80 ranging from 1,000 m to 3,000 m (DeLeon-Rodriguez et al., 2013; Maki et al., 2015).  
81 There are also a few studies on the vertical bacterial distribution from the ground level  
82 to the troposphere (DeLeon-Rodriguez et al., 2013; Maki et al., 2015). Nonetheless,  
83 while some variations were observed, the specific changes in tropospheric bioaerosols  
84 over East Asia, and, in particular, differences between Asian dust and non-dust events  
85 remain poorly understood.

86 Organic aerosol particles, such as bioaerosols, account for high rates of  
87 tropospheric aerosols, ranging from 30 % to 80 % (Jaenicke, 2005), and fluctuate at  
88 high concentrations, ranging from  $10^3$  to  $10^5$  particles  $m^{-3}$ , under the boundary layer at  
89 4,000 m above the ground (Twohy et al., 2016). Epifluorescence microscopy using  
90 fluorescent-dye staining is a useful tool for observation and determination of microbial  
91 particles in the atmosphere, demonstrating that the biomass of airborne microorganisms  
92 increased 10– to 100–fold during Asian-dust events (Hara et al., 2012, Maki et al.,  
93 2014). Under a fluorescence microscope, DNA in microbial particles fluoresce blue  
94 when stained with 4, 6-diamidino-2-phenylindole (DAPI) (Russell et al., 1974), and  
95 organic materials aggregated with proteins and microbial cell components were  
96 confirmed as yellow fluorescence particles (Mostajir et al., 1995). Mineral particles

97 (white particles) and black carbon (black particles) can also be observed as background  
98 fluorescence in microscopic observation fields (Maki et al., 2014). Accordingly, several  
99 DAPI-stained particles could be detected in air samples collected from all over Japan  
100 during dust events (Maki et al., 2013) and can be used as indicators for evaluating the  
101 amounts of some aerosol species during dust events.

102 In this study, the bacterial communities from different altitudes around the  
103 Japanese islands were compared to identify the potential influences of long-range  
104 transported air masses on tropospheric bacteria. We used a helicopter for collecting air  
105 samples at altitudes ranging from 1,200 m to 3,000 m over the Noto Peninsula, Japan.  
106 Helicopter sampling was used to collect chemical components at high altitudes, which  
107 has previously been used to avoid contamination from the downwash created by  
108 spinning rotors (Watanabe et al., 2016). This air sampling method can directly collect  
109 aerosols moving from Asian continents or marine areas to Japan. We estimated the air  
110 mass conditions using the meteorological data obtained during the sampling periods,  
111 and determined aerosol amounts by using meteorological monitoring and  
112 epifluorescence microscopic observation. Bacterial community structures were analyzed  
113 by using high-throughput sequencing targeting bacterial 16S rRNA genes (16S rDNA).

114

## 115 **2. Experiments**

116

### 117 *2.1. Sampling*

118 Aerosol sampling using a helicopter (R44; Robinson, CA, USA) was performed  
119 over coastal areas from Uchinada (36°67N, 136°64E) to Hakui (36°92N, 136°76E) in the

120 Noto Peninsula, Japan. Both cities are located on the western coast of the Noto  
121 Peninsula where aerosols arrive from continental areas across the Sea of Japan and are  
122 mixed with local aerosols (Fig. 1). The helicopter traveled 20 km northwest from  
123 Kanazawa to Uchinada; air sampling was continuously conducted from Uchinada to the  
124 northern coastal areas. To compare the vertical distributions of airborne bacteria during  
125 dust and non-dust events, air samples were collected using a helicopter at the 1 to 3  
126 altitudes ranging from 500 m to 3,000 m above ground level (Table 1). Air samples from  
127 low altitude regions (10 m above ground level) were collected from the roof of a  
128 building located at Taki bay in Hakui (36°92 N, 136°76 E). To compare the vertical  
129 bacterial distribution, aerosol samples were collected during the daytime (from 9:00  
130 Japanese standard time [JST; UTC + 9 h] to 16:30 JST) on March 19, 2013; April 28,  
131 2013; March 28, 2014; and March 20, 2015. These samples were collected at the  
132 following altitude sets; (1) 2,500 m, 1,200 m, and 10 m; (2) 3,000 m, 1,200 m, and 10  
133 m; (3) 3,000 m, 1,200 m, and 10 m; and (4) 2,500 m and 500 m, respectively, and  
134 samples were labeled as shown in Table 1. To investigate the bacterial changes at  
135 altitudes in response to time, temporal transect at the altitude of 1,200 m was prepared  
136 for seven days – the 23rd, 24th, 25th, and 29th of March 2014 and the 16th, 17th, and  
137 21st of March 2015 – and the sample names are showed in Table 1.

138 Air samples were collected through sterilized polycarbonate filters (0.22- $\mu$ m pore  
139 size; Whatman, Tokyo, Japan) with sterilized filter holders (Swinnex Filter holder;  
140 Merck, Darmstadt, German) connected to an air pump. At the sterilization processes, the  
141 filters and the filter-holder parts were irradiated separately under UV light for 1.0 h and  
142 the filter holders attached with the filters were autoclaved at 121 °C for 20 min. Air

143 sampling was performed with a flow rates of 5 L min<sup>-1</sup> over sampling periods from 0.2 h  
144 to 1.0 h. Triplicate sampling filters were obtained for each altitude. During helicopter  
145 sampling, outside air was transferred from a window to the bioaerosols-sampling inlet,  
146 which was sterilized by autoclaving and UV irradiation. The sterilized filter holders  
147 were inserted into the sampling inlet to avoid contamination. To collect air particles at  
148 an altitude of 10 m, we used filter holders fixed on a 3 m stick, which was placed on the  
149 roof of a building (Maki et al., 2014).

150 In total, 18 air samples were obtained during the sampling periods (Table 1). Of  
151 the two filters used to collect each sample, one filter was used to determine the  
152 particulate abundances under fluorescence microscopy, and the other was stored at  
153 -80°C before the extraction of genomic DNA for analysis of bacterial compositions.

154

## 155 *2.2. Characteristics and trajectories of air masses*

156 Information regarding weather conditions (temperature, relative humidity, and  
157 pressure) was gathered. During the helicopter flight, outside air was transferred from a  
158 window into the meteorological-measurement inlet, into which the adaptor of the  
159 measurement device (TR-73U; T&D Corporation, Matsumoto, Japan) was inserted, and  
160 the temperature, relative humidity, and pressures were sequentially measured. The  
161 temperature and relative humidity at an altitude of 10 m were also measured on the roof  
162 of a building in Hakui. The depolarization ratio, which was measured by Laser Imaging  
163 Detection and Ranging (LIDAR) measurements at Toyama, has been used for the  
164 detection of non-spherical aerosols, such as mineral dust particles and/or sea salts.

165 To track the transport pathways of air masses, 72 h back trajectories were



166 calculated using the National Oceanic and Atmospheric Administration (NOAA)  
167 HYbrid Single Particle Lagrangian Integrated Trajectory (HYSPLIT) model  
168 (<http://www.arl.noaa.gov/HYSPLIT.php>). The coordinator of Hakui was used as the  
169 back trajectory starting point at several altitudes from 10 m to 3,000 m above ground  
170 level to estimate the trajectories of the air masses.

171

### 172 *2.3. Determination of particle abundance*

173 The air particles at each altitude were measured using an optical particle counter  
174 (OPC: Rion, Tokyo, Japan). The OPC device was connected to the  
175 meteorological-measurement inlet. The air particles at an altitude of 10 m were also  
176 counted using the OPC device placed on the roof of a building.

177 Fluorescent particles stained with DAPI were also counted via epifluorescence  
178 microscopy. Within 2 h of sampling, 1 mL of 1 % paraformaldehyde was added to one  
179 of the filters to fix the aerosols. After a 1 h incubation, the filter was stained with DAPI  
180 at a final concentration of 0.5  $\mu\text{g mL}^{-1}$  for 15 min (Russell et al., 1974). Next, the filter  
181 was placed on a slide in a drop of low-fluorescence immersion oil (Type-F  
182 IMMOIL-F30CC, Olympus, Tokyo, Japan). A second drop of oil was added, and a  
183 coverslip was placed on top. Particles on the filter were observed using a fluorescence  
184 microscope (BX-51, Olympus, Tokyo, Japan) with a UV excitation system. A filter  
185 transect was scanned, and the four categorized particles, including white fluorescent  
186 particles, blue fluorescent particles (microbial particles), yellow fluorescent particles,  
187 and black particles, on the filter transect were counted using a previously reported  
188 observational technique (Maki et al., 2014). The TA connections in DNA sequences of

189 microbial particles are bound with DAPI, emitting clear blue fluorescence. However, the  
190 aggregation of organic matter might also accumulate DAPI at high amounts emitting  
191 yellow fluorescence, which is due to formation of a compound with DAPI. Mineral  
192 particles often have white autofluorescence or emit weak-blue (mostly white)  
193 fluorescence originating from residues of DAPI on the particle surfaces and can be  
194 identified on the weak blight background of microscopic observation fields. The black  
195 color of black carbon can be identified in the background. The detection limit of aerosol  
196 particle concentration was  $1.1 \times 10^4$  particles  $\text{m}^{-3}$  of air.

197

#### 198 *2.4. Analysis of bacterial community structures using MiSeq sequencing analysis* 199 *targeting 16S rDNA sequences*

200 After the aerosol particles on the other two filters were suspended in 3 mL of  
201 sterile 0.6 % NaCl solution, the particles were pelleted by centrifugation at  $20,000 \times g$   
202 for 10 min. The genomic DNA (gDNA) was then extracted from the particle pellets  
203 using sodium dodecyl sulfate, proteinase K, and lysozyme and purified by  
204 phenol-chloroform extraction as previously described (Maki et al., 2008). The bacterial  
205 community structure was determined using MiSeq DNA sequencing, which facilitates  
206 multiplexed partial sequencing of 16S rDNA. Fragments of 16S rDNA (approximately  
207 500 bp) were amplified from the extracted gDNA by PCR using the universal 16S  
208 rDNA bacterial primers 515F (5'- Seq A -TGTGCCAGCMGCCGCGGTAA-3') and  
209 806R (5'- Seq B -GGACTACHVGGGTWTCTAAT-3') (Caporaso et al., 2011), where  
210 Seq A and Seq B represent the nucleotide sequences bounded by the second set of PCR  
211 primers described below. The PCR amplicon sequences covered the variable region V4

212 of the 16S rRNA gene. Thermal cycling was performed using a thermocycler (Program  
213 Temp Control System PC-700; ASTEC, Fukuoka, Japan) under the following  
214 conditions: denaturation at 94°C for 1 min, annealing at 52°C for 2 min, and extension  
215 at 72°C for 2 min for 20 cycles. Fragments of 16S rDNA in PCR products were  
216 amplified again using the second PCR forward primer (5'- Adaptor C - xxxxxxxx - Seq  
217 A -3') and reverse primer (5'- Adaptor D - Seq B -3'), where Adaptors C and D were  
218 used for the Miseq sequencing reaction. The sequences "xxxxxxx" comprise an 8  
219 nucleotide sequence tag designed for sample identification barcoding. Thermal cycling  
220 was performed under the following conditions: denaturation at 94°C for 1 min,  
221 annealing at 59°C for 2 min, and extension at 72°C for 2 min for 15 cycles. PCR  
222 amplicons were purified using the MonoFas DNA purification kit (GL Sciences, Tokyo,  
223 Japan). PCR amplicons from each sample were pooled at approximately equal amounts  
224 into a single sequencing tube on a MiSeq Genome Sequencer (Illumina, CA, USA)  
225 machine. The sequences obtained for each sample were demultiplexed based on the tag,  
226 including the 8 nucleotide sequence. After removal of the tags, an average read length of  
227 450 bp was obtained. Negative controls (no template and extraction products from  
228 unused filters) were prepared in the DNA extraction process to check for contamination.  
229 The amount of gDNA extracted from air samples ranged from the detection limit (<0.5  
230 ng/samples) to approximately 50 ng/samples and cannot be determined directly by light  
231 absorbance measurements. Accordingly, quantities of gDNA were estimated using the  
232 PCR products after the first amplification step, and compared with the  
233 microbial-particle concentrations that were determined by fluorescence microscopic  
234 observation. The efficiency of the gDNA extraction from air samples was more than

235 80 %.

236 Before the analysis of bacterial community structures, USEARCH v.8.01623  
237 (Edgar, 2013) was used to process the raw Illumina sequencing reads. Anomalous  
238 sequences were removed with the following workflow. First, the forward and reverse  
239 paired-end reads were merged, and the merged reads with lengths outside of the  
240 200-500 bp range or those exceeding 6 homopolymers were discarded using Mothur  
241 v1.36.1 (Schloss et al., 2009). Next, the sequences were subjected to Q-score filtering to  
242 remove reads with more than one expected error. Reads occurring only once in the  
243 entire dataset (singleton) were then removed. These sequences were clustered *de novo*  
244 (with a minimum identity of 97 %) into 204 operational taxonomic units (OTUs) among  
245 the 18 samples. The taxonomy of the representative OTU sequences was assigned using  
246 the RDP classifier (Wang et al., 2007) implemented in QIME v1.9.1 (Caporaso et al.,  
247 2010). Non-metric multidimensional scaling (NMDS) plot of the pairwise Bray-Curtis  
248 distance matrix were used for the classification of all air samples. Greengenes release  
249 13\_8 (McDonald et al., 2012) was used as the reference taxonomic database.

250

### 251 2.5. Accession numbers

252 All data obtained from MiSeq sequencing data have been deposited in the  
253 DDBJ/EMBL/GenBank database (accession number of the submission is  
254 PRJEB17915).

255

## 256 **3. Results**

257

258 *3.1. Air mass analyses using LIDAR measurements, back trajectories, and metrological*  
259 *data*

260 The vertical distributions of the depolarization ratio determined by LIDAR  
261 measurements were assessed for the four sampling events (March 19, 2013; March 20,  
262 2015; April 28, 2013; and March 28, 2014). The depolarization ratio increased at the  
263 altitude of 3,000 m on March 19, 2013 (Fig. 2a), while it decreased at the middle  
264 altitude of 1,000 m. The air mass on March 20, 2015 showed high values of  
265 depolarization ratio at altitudes of 2,500 m and 500 m, consistent with the vertical  
266 distribution of non-spherical (mineral dust) particles over the Noto Peninsula (Fig. 2d).  
267 A 3-day back trajectory analysis indicated that the air mass at 3,000 m on both sampling  
268 dates came from the Asian desert region to the Noto Peninsula (Hakui) immediately  
269 across the Sea of Japan (Fig. 3). These results indicated the dust event occurrence on  
270 March 19, 2013 was specific to the upper altitude of 3,000 m, while the dust event on  
271 March 20, 2015 occurred between the altitudes of 2,500 m and 500 m. Moreover,  
272 samples collected on April 28, 2013 and March 28, 2014 exhibited low depolarization  
273 ratio (Fig. 2b-c), and the air masses on these two sampling dates came from areas of  
274 North Asia, including eastern Siberia (Fig. 3).

275 The air-sampling periods from the March 2014 time series (from the 23rd to the 29th  
276 of March 2014) and the March 2015 time series (from the 16th to the 21st of March  
277 2015) showed different patterns of depolarization ratio and air mass trajectory roots  
278 between the two series (Figs. 4 and 5). Depolarization ratio from March 2014  
279 maintained lower values (Fig. 4a) and the trajectory lines changed the roots from eastern  
280 Siberia to the Korean Peninsula before surrounding the Japanese islands (Fig. 4c). In

281 contrast, the sampling period during March 2015 had substantially higher depolarization  
282 ratio, indicating a strong presence of mineral dust particles (Fig. 5a), and air masses at  
283 3,000 m consistently originated from the Asian desert regions (Fig. 5c).

284 Temperatures from March 19, 2013; April 28, 2013; March 28, 2014; and March 20,  
285 2015 increased from approximately 290 K to approximately 300 K at middle altitudes  
286 (500 m and 1,200 m) (Fig. 2). The temperature profile clearly indicated the presence of  
287 a thin boundary under the upper altitudes (2,500 m and 3,000 m), which suggested that  
288 there is a difference in air qualities between the middle and upper altitudes (Table 1).

289 During the March 2014 time series, temperatures dynamically changed at altitudes of  
290 approximately 1,200 m, while those from the March 2015 time series (the 16th, 17th,  
291 and 21st of March 2015) were stable at 1,200 m (Figs. S1 and S2). These results  
292 indicate that the boundary layers were located at 1,200 m during the March 2014 time  
293 series, whereas the tropospheric air transported by westerly winds was suspended at the  
294 sampling altitudes (500 m and 1,200 m) used during the March 2015 time series.

295

### 296 *3.2. Vertical distributions and sequential variations of aerosol particles*

297 Aerosol particle concentrations from the ground level to the troposphere were  
298 measured using OPC to compare the vertical distributions of aerosols from the four  
299 sampling events. The OPC-measured particles on March 19, 2013 and March 20, 2015  
300 maintained similar concentrations below the troposphere (Fig. 2ad), while the  
301 concentrations on April 28, 2013 and March 28, 2014 decreased one or two orders of  
302 magnitude between the troposphere and ground level (Fig. 2bc). At high altitudes (2,000  
303 m to 2,500 m), the coarse particles (greater 1.0  $\mu\text{m}$ ) observed on March 19, 2013 and

304 March 20, 2015 were one or two orders of magnitude higher ( $10^5$  to  $10^6$  particles  $m^{-3}$ )  
305 than those on April 28, 2013 and March 28, 2014 (no more than  $1.2 \times 10^4$  particles  $m^{-3}$ ).  
306 The fine particles ( $0.3 \mu m$  to  $1.0 \mu m$ ) showed similar concentrations between the four  
307 sampling events, fluctuating between  $1.2 \times 10^6$  to  $3.5 \times 10^7$  particles  $m^{-3}$ . At lower  
308 altitudes (130 m to 510), the aerosol particles had similar concentrations and size  
309 distributions between the four sampling periods; the course particle concentration  
310 ranged from  $8.4 \times 10^5$  particles  $m^{-3}$  to  $1.2 \times 10^6$  particles  $m^{-3}$ , and the fine particles  
311 ranged from  $1.3 \times 10^7$  particles  $m^{-3}$  to  $1.2 \times 10^8$  particles  $m^{-3}$ .

312 OPC measurements indicated that air samples collected at 1,200 m during the March  
313 2015 time series consistently contained course particles at one or two orders of  
314 magnitude higher in concentration ( $1.4 \times 10^6$  to  $3.4 \times 10^6$  particles  $m^{-3}$ ) than detected in  
315 the March 2014 time series, which had concentrations of no more than  $1.8 \times 10^5$   
316 particles  $m^{-3}$  (Fig. 4b). The concentration of relatively large particles ( $>5.0 \mu m$ ) in  
317 March 2015 maintained relatively higher concentrations (from  $1.4 \times 10^4$  to  $8.2 \times 10^5$   
318 particles  $m^{-3}$ ) than those observed in March 2014 (no more than  $3.74 \times 10^3$  particles  $m^{-3}$ ).  
319 In contrast, the fine particles measured in March 2014 and March 2015 fluctuated  
320 around similar concentrations ranging from  $10^7$  to  $10^8$  particles  $m^{-3}$ .

321 Based on the above observations, the sampled air masses that were influenced by  
322 Asian dust events and included dust particles were categorized as “dust samples”. The  
323 sampled air masses that were not influenced by dust events or contained less dust  
324 particles were categorized as “non-dust samples”, in relation to the presence or absence  
325 of dust events as the source of the aerosol samples (Table 1).

326

327 *3.3. Fluorescent microscopic observation of aerosol particles*

328 Using epifluorescence microscopy with DAPI staining, the aerosol particles in the  
329 18 air samples emitted several types of fluorescence, categorized as white, blue, yellow,  
330 or black (Fig. S3). White fluorescence particles, (white particles) were indicative of  
331 mineral particles originating from the sand or soil. Microbial (prokaryotic) particles  
332 stained with DAPI emitted blue fluorescence, forming coccoid- or bacilli-like particles  
333 with a diameter  $<3 \mu\text{m}$ . Yellow fluorescence particles (yellow particles) stained with  
334 DAPI were organic matter and ranged from  $1.0 \mu\text{m}$  to  $10 \mu\text{m}$  in diameter. Most of the  
335 yellow particles disappeared in the aerosol-particle suspending solutions after protease  
336 treatment, suggesting that the yellow particles consisted mainly of proteins. Black  
337 particles were indicative of an anthropogenic black carbon originating from East Asian  
338 regions, produced by biomass burning, industrial activities, and vehicle exhaust.

339 The dust samples from upper altitudes (2,500 m and 3,000 m) contained 5 to 100  
340 times higher concentrations of microbial, organic, and white particles than the  
341 concentrations detected in the non-dust samples (Fig. 2). In the upper altitude dust  
342 samples, the concentration of mineral particles ranged from  $7.77 \times 10^5 \text{ particles m}^{-3}$  to  
343  $1.08 \times 10^6 \text{ particles m}^{-3}$  (Fig. 2ad), whereas the concentrations of the non-dust samples  
344 ranged from  $3.14 \times 10^4 \text{ particles m}^{-3}$  to  $1.48 \times 10^5 \text{ particles m}^{-3}$  (Fig. 2bc). The  
345 microbial particles in the high altitude dust samples exhibited concentrations of  
346 approximately  $1.5 \times 10^6 \text{ particles m}^{-3}$  that were two orders of magnitude higher than in  
347 the non-dust samples (approximately  $6.0 \times 10^4 \text{ particles m}^{-3}$ ). The organic particles in  
348 the high altitude dust samples were also found at higher concentrations of  
349 approximately  $4.2 \times 10^6 \text{ particles m}^{-3}$  than those from the non-dust samples 13H428-u



350 and 14H328-u, which were  $2.12 \times 10^4$  particles  $m^{-3}$  and  $5.30 \times 10^4$  particles  $m^{-3}$ ,  
351 respectively. In contrast, the air samples collected at the low altitude of 10 m exhibited a  
352 random or stochastic pattern between  $10^5$  and  $10^6$  particles  $m^{-3}$ , regardless of the  
353 sampling dates (Fig. 2). Black particles were observed in the four air samples from 10 m  
354 and fluctuated around concentrations of less than  $8.48 \times 10^4$  particles  $m^{-3}$ . Finally, the  
355 percentage of organic particles out of the total number of particles (organic and  
356 microbial particles) in the dust samples 13H319-u, 15H320-u, and 15H320-m ranged  
357 between approximately 71.5 % and 73.6 %, which was higher than in the non-dust  
358 samples, which ranged from 4.6 % to 46.3 % (Fig. S4).

359 All types of fluorescence particles were also observed in the sequentially collected  
360 air samples at 1,200 m in the March 2015 time series (except for 2,500 m on March  
361 20th) and the March 2014 series. The dust samples examined from the March 2015  
362 series had higher concentrations of total particles than the non-dust samples of the  
363 March 2014 series (Figs. 4 and 5). The mineral particles detected in the March 2014  
364 series fluctuated at low concentrations from  $3.39 \times 10^4$  particles  $m^{-3}$  to  $2.62 \times 10^5$   
365 particles  $m^{-3}$  (Fig. 4), while in the March 2015 series the mineral particles showed  
366 higher values from  $1.80 \times 10^5$  particles  $m^{-3}$  to  $1.77 \times 10^7$  particles  $m^{-3}$  (Fig. 5). High  
367 levels of organic particles were detected in the March 2015 series samples, ranging from  
368  $3.13 \times 10^5$  to  $3.75 \times 10^7$  particles  $m^{-3}$ , which decreased to below  $2.28 \times 10^5$  particles  $m^{-3}$   
369 in the March 2014 series samples. The microbial particle concentrations in the March  
370 2015 series samples (ranging from  $4.75 \times 10^5$  to  $2.06 \times 10^6$  particles  $m^{-3}$ ) were higher  
371 than those of in the March 2014 series samples (ranging from  $3.31 \times 10^5$  to  $1.25 \times 10^6$   
372 particles  $m^{-3}$ ). The ratio of organic particles to the total number of organic and microbial

373 particles detected during March 2015 (71.5 % to 95.6 %) were higher than those during  
374 March 2014 series (8.0 % to 36.2 %) (Fig. S4). The black particles were randomly  
375 observed in all samples from March 2015 and March 2014.

376

#### 377 *3.4. Analysis of bacterial communities using MiSeq sequencing analysis*

378 For the analysis of the prokaryotic composition in the 18 samples, we obtained  
379 645,075 merged paired-end sequences with the lengths ranging from 244 bp to 298 bp  
380 after quality filtering, and the sequence library size for each sample was normalized at  
381 1,500 reads. The 16S rDNA sequences were divided into 204 phylotypes (sequences  
382 with >97 % similarity). Phylogenetic assignment of sequences resulted in an overall  
383 diversity of 16 phyla and candidate divisions, 32 classes (and class-level candidate taxa),  
384 and 72 families (and family-level candidate taxa). The majority (>90 %) of the  
385 sequences were represented by 9 bacterial classes and 33 families (Figs. 6 and 7). The  
386 bacterial compositions varied during the sampling periods and included the phylotypes  
387 belonging to the classes Cyanobacteria, Actinobacteria, Bacilli, Bacteroidetes, SBRH58,  
388 and Proteobacteria (Alpha, Beta, Gamma, and Deltaproteobacteria), which are typically  
389 generated from atmospheric, terrestrial and marine environments. On the box plots, the  
390 numbers of bacterial species estimated by Chao I were similar at average levels between  
391 the dust samples and non-dust samples, while the Chao I and Shannon values of the  
392 non-dust samples showed a wider range than that of dust samples (Fig. 8a). A  
393 non-metric multidimensional scaling (NMDS) plot demonstrated the distinct clustering  
394 of prokaryotic communities separating the dust samples and the non-dust samples (Fig.  
395 8b). For the PCR-analysis steps, negative controls (no template and template from

396 unused filters) did not contain 16S rDNA amplicons demonstrating the absence of  
397 artificial contamination during experimental processes.

398

### 399 *3.5. Vertical distributions of bacterial communities in dust and non-dust samples*

400 The vertical distributions of bacterial compositions showed different patterns  
401 between dust event days and non-dust days (Fig. 6). In the dust samples collected at  
402 upper altitudes, phylotypes belonging to the phylum Bacilli accounted for more than  
403 60.5 % of the total and were mainly composed of members of the families Bacillaceae  
404 and Paenibacillaceae (Fig. 6). Bacterial numbers from the phylum Bacilli decreased at  
405 lower altitudes during dust events, and the phylotypes of Cyanobacteria, Actinobacteria,  
406 and Proteobacteria increased in relative abundance in the samples collected at middle and  
407 low altitudes (13H319-m, 13H319-l, and 15H320-m).

408 Cyanobacteria, Actinobacteria, and Proteobacteria sequences also dominated in the  
409 air samples collected during non-dust events (13H428-m, 14H328-u, 14H328-m, and  
410 14H328-l). Specifically, Actinobacteria phylotypes increased in their relative abundance,  
411 ranging from 14.1 % to 24.7 % in the non-dust samples collected on March 28, 2014.  
412 Proteobacteria phylotypes containing several bacterial families occupied a high relative  
413 abundance, ranging from 60.5 % to 85.3 % in the non-dust samples 13H428-u,  
414 13H428-m, 14H328-u, 14H328-m, and 14H328-l. In particular, the non-dust samples  
415 collected on March 28, 2014 included the Alphaproteobacteria phylotypes, which have  
416 composed of members of the families Phyllobacteriaceae and Sphingomonadaceae.  
417 Most Betaproteobacteria, phylotypes including the families Oxalobacteraceae and  
418 Comamonadaceae, were specific to the non-dust samples collected at 1,200 m and 2,500

419 m on April 28, 2013.

420 Cyanobacteria phylotypes, which were randomly detected from both dust samples  
421 and non-dust samples, particularly increased in both the non-dust sample collected at 10  
422 m on April 28, 2013 and the dust sample collected at 3,000 m on March 20, 2015, with a  
423 relative abundance of 15.3 % and 74.6 %, respectively. Bacteroidia phylotypes also  
424 randomly appeared in several air samples, regardless of the dust event influences and  
425 were present at maximal levels in the non-dust sample 13H319-m, with a relative  
426 abundance of 35.6 %.

427

### 428 *3.6. Variations in bacterial communities during dust events and non-dust events*

429 Sequential variations in the bacterial composition of air samples at altitudes of  
430 1,200 m or 2,500 m were compared between dust event periods (March 2015 series) and  
431 non-dust periods (March 2014 series). During the March 2015 dust event, phylotypes of  
432 the family Bacillaceae in the class Bacilli occupied more than 53.0 % of the relative  
433 abundance in the four dust samples collected (Fig. 7). Cyanobacteria phylotypes related  
434 to the marine cyanobacterium Synechococcaceae uniquely appeared in the dust samples  
435 of the March 2015 series; their abundance fluctuated the values ranging from 12.5 % to  
436 14.8 % between the 16th and the 20th of March 2015 before decreasing to 1.5 % on  
437 March 20.

438 During the non-dust periods of the March 2014 series at the middle altitude, the  
439 relative abundance of Actinobacteria phylotypes belonging to the family  
440 Micrococcaceae was occupied 59.9 % on March 23, decreased to 19.5 % on March 24,  
441 and disappeared from samples collected on March 29. Corresponding to the decrease in

442 Actinobacteria phylotypes, Alpha and Gammaproteobacteria phylotypes showed an  
443 increasing trend from 30.6 % to 96.8 % between the 23rd and the 29th of March 2014  
444 (Fig. 7a). Alphaproteobacteria phylotypes belonging to the families Sphingomonadaceae,  
445 and Phyllobacteriaceae, consistently appeared throughout the sampling periods of the  
446 March 2014 series and occupied a maximum relative abundance of 72.9 % and 22.3 %  
447 respectively. For Gammaproteobacteria, the Xanthomonadaceae sequences dominated at  
448 a relative abundance of 18.3 % and 5.4 % in the non-dust samples 14H325-m and  
449 14H329-m, respectively, during the air mass was suspended the Japanese islands for a  
450 few days.

451

#### 452 **4. Discussion**

453

##### 454 *4.1 Air mass conditions during Asian dust and non-dust events*

455 Westerly winds blowing over East Asia disperse airborne microorganisms  
456 associated with dust mineral particles (Maki et al., 2008) and anthropogenic particles  
457 (Cao et al., 2014; Wei et al., 2016), influencing the abundances and taxon compositions  
458 of airborne bacteria at high altitudes over downwind areas, such as Noto Peninsula  
459 (Maki et al., 2013). In this investigation, the increases in aerosol particles (dust  
460 particles) and associated microbial particles were observed over the Noto Peninsula  
461 during the dust events of March 19, 2013 and March 20, 2015 (Figs. 2 and 4). At the  
462 two sampling dates, the air mass including microbial particles had traveled from the  
463 Asian desert region throughout the anthropogenic polluted areas (Fig. 2), and the dust  
464 particles entered the Japanese troposphere and were maintained at high altitudes (March

465 19, 2013) or mixed with the ground-surface air (March 20, 2015). During non-dust days,  
466 the air masses at high altitudes came from several areas, including the eastern region of  
467 Siberia, Asian continental coasts (Korean Peninsula), the Sea of Japan, or surrounding  
468 Japanese islands, and mixed with ground-surface air over the Noto Peninsula. The air  
469 samples collected during dust and non-dust events were valuable for understanding the  
470 westerly wind influences on vertical distributions and sequential dynamics of airborne  
471 bacteria at high altitudes over the downwind regions.

472

#### 473 *4.2 Aerosol dynamics during Asian dust and non-dust event*

474 The microscopic fluorescence particles of all samples could be separated into four  
475 categories: mineral (white), microbial (blue), organic (yellow), and black-carbon (black)  
476 particles (Fig. S3), which were observed in the previous air samples collected during  
477 dust events (Maki et al., 2015). The amount of microbial particles increased at high  
478 altitudes during dust events, suggesting that the dust events directly carried bacterial  
479 particles to the troposphere over downwind areas. At low altitudes, similar  
480 concentrations of fluorescent particles were observed in air samples collected between  
481 dust events (13H319-l) and non-dust events (13H428-l) (Fig. 2) because the dust  
482 particles did not reach the ground surface on the dust-event days. In the absence of the  
483 influences of dust-events, the aerosols mainly originated from local environments in  
484 Japanese areas.

485 Organic particles also increased during dust events and in the ratios between all  
486 particles related to the dust events. The organic particles originate from proteins and  
487 other biological components (Mostajir et al., 1995). The tropospheric aerosols would be

488 composed of organic particles at high rates ranging from 30 % to 80 % (Jaenicke, 2005),  
489 and organic particle concentrations fluctuated from  $10^3$  to  $10^5$  particles  $m^{-3}$  at high  
490 altitudes of 4,000 m above the ground (Twohy et al., 2016). The dead-phase cells of  
491 microbial isolates obtained from aerosol samples mainly irradiated yellow fluorescence  
492 instead of blue fluorescence (Liu et al., 2014). When fungi (*Bjerkandera adusta*) and  
493 bacteria (*Bacillus* spp.) isolated from aerosol samples were incubated, the dead-phase  
494 microbial cells mainly irradiated yellow fluorescence instead of blue fluorescence (Liu  
495 et al., 2014; Fig. S3). The relative numbers of organic particles to the total number of  
496 microbial and organic particles in the dust samples showed significantly higher values  
497 ( $82.9 \pm 32.3$  %) than in the non-dust samples ( $23.3 \pm 13.7$  %) (Fig. S4). Hara and Zhang  
498 reported that dust events in Kyushu, Japan, resulted in an increased ratio of damaged  
499 microbial cells in the air at the ground-surface and that the ratio increased to  
500 approximately 80 % (Hara and Zhang, 2012). Furthermore, organic molecules  
501 associated with dust aerosols are reported to be composed of mannitol, glucose, and  
502 fructose, which are part of cell components of airborne microorganisms and contribute  
503 to the formation of secondary organic aerosols (SOA) (Fu et al., 2016). Microbial cells  
504 or their components coming from Asian continents to Japan would be exposed to air at  
505 high-altitudes during their long-range transport, increasing the ratios of damaged and  
506 dead cells or SOA.

507 The appearance of black carbon most likely originated from anthropogenic  
508 activities, such as biomass burning, industrial activities, and vehicle exhaust (Chung and  
509 Kim, 2008). In the anthropogenic regions of eastern China, anthropogenic particles  
510 originating from human activities are expected to comprise more than 90 % of dust

511 particles (Huang et al., 2015a). When the westerly winds are strongly blowing over the  
512 Noto Peninsula, the black carbon particles at upper altitudes (3,000 m) are thought to  
513 mainly derive from continental anthropogenic regions.

514

#### 515 *4.3 Comparing the community structures of atmospheric bacteria between Asian dust* 516 *and non-dust events*

517 Dust events and air-pollutant occurrences changed the airborne bacterial  
518 communities over the downwind areas, such as Beijing (Jeon et al., 2011; Cao et al.,  
519 2014) and east Mediterranean areas (Mazar et al., 2016). The westerly winds blowing  
520 over East Asia would transport airborne bacteria to the high-altitude atmosphere over  
521 the Noto Peninsula (Maki et al., 2015) and North American mountains (Smith et al.,  
522 2013). Our box plots analysis suggested that changes in the bacterial diversity in the  
523 dust samples would be more stable than in the non-dust samples (Fig. 8a). Furthermore,  
524 using a NMDS plot, the bacterial compositions in the dust samples could be  
525 distinguished from non-dust samples (Fig. 8b). Thus, the aerosol particles transported  
526 by Asian dust events changed the atmospheric bacterial composition at higher altitudes  
527 over downwind areas.

528 The phylotypes in the dust samples were predominately clustered into the class  
529 Bacilli (Fig. 4a), while the non-dust samples mainly included the phylotypes of the  
530 classes Alpha, Beta, and Gammaproteobacteria and Actinobacteria. Our previous  
531 investigations indicated that the bacterial communities at an altitude of 3,000 m over the  
532 Noto Peninsula included more than 300 phylotypes, which were predominantly  
533 composed of Bacilli phylotypes (Maki et al., 2015). Bacterial groups belonging to



534 Bacilli, Proteobacteria, and Actinobacteria have been reported as airborne bacteria  
535 around European mountains (Vařtilingom et al., 2012) as well as over Asian rural  
536 regions (Woo et al., 2013). Some Bacilli isolates were found to act as ice-nucleating  
537 agents and to be involved in ice cloud (Matulova et al., 2014; Mortazavi et al., 2015).  
538 Isolates of Gammaproteobacteria isolates were obtained from mineral dust particles  
539 (Hara et al., 2016a), glaciated high-altitude clouds (Sheridan et al., 2003), and plant  
540 bodies (Morris et al., 2008), and some isolate species, such as *Pseudomonas*, were  
541 confirmed to have the ice-nucleation activity. Accordingly, Bacilli and Proteobacteria  
542 members associated with dust events could potentially contribute to climate change  
543 resulting from dust events.

544

#### 545 *4.4 Dominant bacterial populations in the air masses transported from Asian continents*

546 In some dust-event samples collected at high altitudes (13H319-u, 15H320-u, and  
547 15H320-m), Bacilli sequences accounted for more than 52.7 % of the total number of  
548 sequences (Fig. 6). Back trajectories on March 19, 2013 and March 20, 2015 came from  
549 the Asian desert region to the Noto Peninsula. Some *Bacillus* species were  
550 predominantly detected at high altitudes above the Taklimakan Desert (Maki et al.,  
551 2008) and above downwind areas during Asian dust events (Maki et al., 2010 and 2013;  
552 Smith et al., 2013; Jeon et al., 2011; Tanaka et al., 2011). *Bacillus* species are the most  
553 prevalent isolates obtained from mineral dust particles collected over downwind areas  
554 (Hua et al., 2007; Gorbushina et al., 2007).

555 Bacilli members can form resistant endospores that support their survival in the  
556 atmosphere (Nicholson et al., 2000). The *Bacillus* isolates obtained from atmospheric

557 samples showed higher-level resistance to UV irradiation than normal isolates  
558 (Kobayashi et al., 2015). In the Gobi Desert, dust events increase the diversity of  
559 airborne microbial communities; after dust events, spore-forming bacteria, such as  
560 *Bacillus*, increase in their relative abundances (Maki et al., 2016). Accordingly, in the  
561 atmosphere, selected Bacilli members associated with dust particles would be  
562 transported over long distances.

563         The Bacilli sequences showed different vertical variations between the two dust  
564 events on March 19, 2013 and March 20, 2015. On March 19, 2013 (13H319-m), the  
565 relative abundances of Bacilli sequences decreased dynamically from 3,000 m to 1,200  
566 m, while unstable atmospheric layers on March 20, 2015 most likely mixed the  
567 long-range transported bacteria with the regional bacteria over the Noto Peninsula. A  
568 previous investigation also demonstrated the vertical mixture of airborne bacteria over  
569 Suzu in the Noto Peninsula (Maki et al., 2010).

570         Actinobacteria sequences decreased in relative abundance between the 23rd and  
571 29th of March 2014 corresponding with changes in the air mass trajectory roots from  
572 north Asian regions, such as eastern Siberia and Japan (Fig. 7). Furthermore,  
573 Actinobacteria sequences appeared in the samples collected from air masses that were  
574 transported throughout the Korean Peninsula on March 19, 2013; April 28, 2013; and  
575 March 20, 2015. Actinobacteria members are frequently dominant in terrestrial  
576 environments but seldom survive in the atmosphere for a long time, because they cannot  
577 form spores (Puspitasari et al., 2015). However, the family Micrococcaceae in  
578 Actinobacteria was primarily detected from anthropogenic particles collected in Beijing,  
579 China (Cao et al., 2014). Over anthropogenic source regions for Asian continents,

580 anthropogenic particles occupy more than 90 % of dust particles and originate from  
581 soils disturbed by human activities in cropland, pastureland, and urbanized regions  
582 (Huang et al., 2015a; Guan et al., 2016). Air masses transported from the continental  
583 coasts are expected to include a relatively high abundance of Actinobacteria members  
584 associated with anthropogenic particles.

585 Natural dust particles from Asian desert areas (Taklimkan and Gobi Deserts) are  
586 transported in the free troposphere (Iwasaka et al., 1988) and vertically mixed with  
587 anthropogenic particles during the transportation processes (Huang et al., 2015a). In  
588 some cases, short-range transport of air masses would carry only anthropogenic  
589 particles to Japan, because the anthropogenic particles are often dominant in Asian  
590 continental coasts (Huang et al., 2015a). Actinobacteria members may have been  
591 transported with anthropogenic particles from continental coasts.

592

#### 593 *4.5 Dominant bacterial populations in the air masses originated from marine* 594 *environments and Japanese islands*

595 Proteobacteria sequences increased in their relative abundances at high altitudes  
596 during non-dust sampling dates (13H428-u, 13H428-m, 14H328-u, 14H328-m, and  
597 March 2014 series), when air mass origins at 1,200 m changed from the Korean  
598 Peninsula to Japan (Fig. 7). Proteobacteria members were the dominate species in the  
599 atmosphere over mountains (Bowers et al., 2012; Väitilingom et al., 2012; Temkiv et al.,  
600 2012), in the air samples collected on a tower (Fahlgren et al., 2010), and from the  
601 troposphere (DeLeon-Rodriguez et al., 2013; Kourtev et al., 2011). In the phylum  
602 proteobacteria, the families Phyllobacteriaceae, Methylobacteriaceae, and

603 Xanthomonadaceae were predominately detected from the non-dust samples and are  
604 associated with plant bodies or surfaces (Mantelin et al., 2006; Fürnkranz et al., 2008;  
605 Khan and Doty, 2009; Fierer and Lennon, 2011). The Betaproteobacteria sequences in  
606 the non-dust samples mainly contained the Oxalobacteraceae and Comamonadaceae  
607 families, which are commonly dominate in freshwater environments (Nold and Zwart,  
608 1998) as well as on plant leaves (Redford et al., 2010). In addition, the class  
609 Alphaproteobacteria in the non-dust samples also included marine bacterial sequences  
610 belonging to the family Sphingomonadaceae (Cavicchioli et al., 2003). Bacterial  
611 populations originating from marine areas are prevalent in cloud droplets (Amato et al.,  
612 2007), in air samples collected from the seashores of Europe (Polymenakou et al., 2008),  
613 in storming troposphere (DeLeon-Rodriguez et al., 2013), and at high altitudes in  
614 Japanese regions (Maki et al., 2014), suggesting that the marine environments represent  
615 a major source of bacteria in clouds. The air masses suspended over the Sea of Japan or  
616 Japanese islands during non-dust events (the March 2014 series) could include a high  
617 relative abundance of airborne bacteria, which were transported from the surface-level  
618 air over the marine environments and the regional phyllosphere.

619

#### 620 *4.6. Bacterial populations commonly detected during dust events and the non-dust* 621 *events*

622 Sequences originating from Synechococcaceae (in the class Cyanobacteria)  
623 randomly appeared in the MiSeq sequencing databases results obtained from air samples,  
624 regardless of dust event occurrences. *Synechococcus* species in the family  
625 Synechococcaceae can eliminate excess peroxide from photosynthesis to resist UV

626 radiation and oxygenic stress (Latifi et al., 2009), suggesting that these bacteria resist  
627 environmental stressors in the atmosphere. In a previous study, the air samples  
628 transported from marine environments to Japan predominately contained *Synechococcus*  
629 species (Maki et al., 2014), which were dominant marine bacteria in the Sea of Japan  
630 and the East China Sea (Choi and Noh, 2009). The cloud water at approximately 3,000  
631 m above ground level was also dominated by Cyanobacteria populations, indicating  
632 their atmospheric transport (Kourtev et al., 2011). In addition to Alphaproteobacteria,  
633 marine cyanobacterial cells can be transported from seawater to the atmosphere, thereby  
634 contributing to the airborne bacterial variations over the Noto Peninsula. Marine  
635 bioaerosols originated from cyanobacteria and gram-negative bacteria (including  
636 Alphaproteobacteria) are reported to contribute the increase of endotoxin levels in  
637 coastal areas influencing human health by inflammation and allergic reaction  
638 (Lang-Yona et al., 2014).

639 Bacteroidetes sequences were detected in some air samples collected during Asian  
640 dust and non-dust events. Members of the phylum Bacteroidetes, which were composed  
641 of the families Cytophagaceae, associate with organic particles in terrestrial and aquatic  
642 environments (Turnbaugh et al., 2011; Newton et al., 2011). Furthermore, these  
643 bacterial populations dominate the atmosphere and sand of desert areas, where plant  
644 bodies and animal feces are sparsely present (Maki et al., 2016). These bacterial groups  
645 possibly originated from organic-rich microenvironments in several areas, such as desert  
646 and marine areas.

647

648 **5. Conclusion**

649 Air samples including airborne bacteria were sequentially collected at high  
650 altitudes over the Noto Peninsula during dust events and non-dust events. The sampled  
651 air masses could be categorized based on sample types with (dust samples) and without  
652 (non-dust samples) dust event influences. Bacterial communities in the air samples  
653 displayed different compositions between dust events and non-dust events. The dust  
654 samples were dominated by terrestrial bacteria, such as Bacilli, which are thought to  
655 originate from the central desert regions of Asia, and the bacterial compositions were  
656 similar between the dust samples. In contrast, the air masses of non-dust samples came  
657 from several areas, including northern Asia, continental coasts, marine areas, and Japan  
658 regional areas, showing different variations in bacterial compositions between the  
659 sampling dates. Some scientists have attempted to apply airborne bacterial composition  
660 as tracers of air mass sources at ground level (Bowers et al., 2011; Mazar et al., 2016).  
661 In this study, the terrestrial bacteria, such as Bacilli and Actinobacteria members (Bottos  
662 et al., 2014), were dominant populations in the air samples transported from Asian  
663 continental areas. The air samples when the air mass was suspended around Japanese  
664 islands, mainly included the members of the classes Alpha (Phyllobacteriaceae and  
665 Methylobacteriaceae), Gamma, and Betaproteobacteria, which are commonly  
666 dominated in phyllosphere (Redford et al., 2010; Fierer and Lennon, 2011) or  
667 freshwater environments (Nold and Zwart, 1998). The atmospheric aerosols transported  
668 via marine areas include a high relative abundances of marine bacteria belonging to  
669 classes Cyanobacteria (Choi and Noh, 2009) and Alphaproteobacteria  
670 (Sphingomonadaceae) (Cavicchioli et al., 2003). This study suggested that bacterial  
671 compositions in the atmosphere can be used as air mass tracers, which could identify the

672 levels of mixed air masses transported from different sources.

673         However, one limitation of our investigation is that the number of samples  
674 analyzed was not sufficient to cover entire changes in airborne bacteria at high altitudes  
675 over the Noto Peninsula. Although the airborne bacterial composition during non-dust  
676 periods was found to change dynamically, only a few types of variation were followed  
677 in this investigation. In the future, greater numbers of samples, which are sequentially  
678 collected at high altitudes using this sampling method, will need to be originated to  
679 more accurately evaluate bioaerosol tracers. Since helicopter sampling procedures  
680 require sophisticated techniques and are expensive, the sample numbers at high altitudes  
681 are difficult to increase. Air sampling at high altitudes should be combined with  
682 sequential ground-air sampling to advance the understanding of the influence of  
683 westerly winds on airborne bacterial dynamics in downwind areas. Metagenomic  
684 analyses and microbial culture experiments would also provide valuable information  
685 about airborne microbial functions relating to ice-nucleation activities, chemical  
686 metabolism, and pathogenic abilities.

687

## 688 **Acknowledgments**

689         We are thankful for the advice given by Dr. Richard C. Flagan of California Institute  
690 of Technology and the sampling support from Dr. Atsushi Matsukia and Dr. Makiko  
691 Kakikawa of Kanazawa University. Trajectories were produced by the NOAA Air  
692 Resources Laboratory (ARL), which provided the HYSPLIT transport and dispersion  
693 model and/or READY website (<http://www.ready.noaa.gov>). Members of Fasmac Co.,  
694 Ltd. helped with the MiSeq sequencing analyses. This research was funded by the

695 Grant-in-Aid for Scientific Research (B) (No. 26304003) and (C) (No. 26340049). The  
696 Bilateral Joint Research Projects from the Japan Society for the Promotion of Science  
697 also supported this work, as did the Strategic International Collaborative Research  
698 Program (SICORP: 7201006051) and Strategic Young Researcher Overseas Visits  
699 Program for Accelerating Brain Circulation (No. G2702). This study was supported by  
700 the Joint Research Program of Arid Land Research Center, Tottori University (No.  
701 28C2015).

702

### 703 **Competing Interests**

704 The authors declare that they have no conflict of interest.

705

### 706 **References**

707 Amato, P., Parazols, M., Sancelme, M., Mailhot, G., Laj, P., and Delort, A.M.: An  
708 important oceanic source of micro-organisms for cloud water at the Puy de Dôme  
709 (France), *Atmos. Environ.*, 41, 8253–8263, 2007.

710 Atkinson, J.D., Murray, B.J., Woodhouse, M.T., Whale, T.F., Baustian, K.J., Carslaw,  
711 K.S., Dobbie, S., O’Sullivan, D., Malkin, T.L.: The importance of feldspar for ice  
712 nucleation by mineral dust in mixed-phase clouds, *Nature*, 498, 355–358, 2013.

713 Bottos, E.M., Woo, A.C., Zawar-Reza, P., Pointing, S.B., and Cary, S.C.: Airborne  
714 Bacterial populations above desert soils of the McMurdo Dry Valleys, Antarctica,  
715 *Microb. Ecol.*, 67, 120–128, 2014.

716 Bowers, R.M., McLetchie, S., Knight, R., and Fierer, N.: Spatial variability in airborne  
717 bacterial communities across land-use types and their relationship to the bacterial



718 communities of potential source environments, *ISME J.*, 5, 601–612, 2011.

719 Bowers, R.M., McCubbin, I.B., Hallar, A.G., and Fierera, N.: Seasonal variability in  
720 airborne bacterial communities at a high-elevation site, *Atmos. Environ.*, 50, 41–49,  
721 2012.

722 Brodie, E.L., DeSantis, T.Z., Parker, J.P.M., Zubietta, I.X., Piceno, Y.M., Andersen,  
723 G.L.: Urban aerosols harbor diverse and dynamic bacterial populations, *Proc. Natl.*  
724 *Acad. Sci. U.S.A.*, 104, 299–304, 2007.

725 Brown, J.K.M., and Hovmøller, M.S.: Aerial dispersal of pathogens on the global and  
726 continental scales and its impact on plant disease, *Science*, 297, 537–541, 2002.

727 Cao, C., Jiang, W., Wang, B., Fang, J., Lang, J., Tian, G., Jiang, J., and Zhu, T.F.:  
728 Inhalable microorganisms in Beijing’s PM<sub>2.5</sub> and PM<sub>10</sub> pollutants during a severe  
729 smog event, *Environ. Sci. Technol.*, 48, 1499–1507, 2014.

730 Caporaso, J.G., Kuczynski, J., Stombaugh, J., Bittinger, K., Bushman, F.D., Costello,  
731 E.K., Fierer, N., Peña, A.G., Goodrich, J.K., Gordon, J.I., Huttley, G.A., Kelley,  
732 S.T., Knights, D., Koenig, J.E., Ley, R.E., Lozupone, C.A., McDonald, D.,  
733 Muegge, B.D., Pirrung, M., Reeder, J., Sevinsky, JR., Turnbaugh, P.J., Walters,  
734 W.A., Widmann, J., Yatsunenko, T., Zaneveld, J., and Knight, R.: QIIME allows  
735 analysis of high-throughput community sequencing data, *Nature methods*, 7,  
736 335–336, 2010.

737 Caporaso, J.G., Lauber, C.L., Walters, W.A., Berg-Lyons, D., Lozupone, C.A.,  
738 Turnbaugh, P.J., Fierer, N., and Knight, R.: Global patterns of 16S rRNA diversity  
739 at a depth of millions of sequences per sample, *Proc. Natl. Acad. Sci.*, 108,  
740 4516–4522, 2011.

741 Cavicchioli, R., Ostrowski, M., Fegatella, F., Goodchild, A., and Guixa-Boixereu, N.:  
742 Life under nutrient limitation in oligotrophic marine environments: an  
743 eco/physiological perspective of *Sphingopyxis alaskensis* (formerly *Sphingomonas*  
744 *alaskensis*), *Microb. Ecol.*, 45, 203–217, 2003.

745 Choi, D.H., and Noh, J.H.: Phylogenetic diversity of *Synechococcus* strains isolated  
746 from the East China Sea and the East Sea, *FEMS Microbiol. Ecol.*, 69, 439–448,  
747 2009.

748 Chung, Y.S., and Kim, H.S.: Observations of massive-air pollution transport and  
749 associated air quality in the Yellow Sea region, *Air Qual. Atmos. Health*, 1, 69–70,  
750 2008.

751 Creamean, J. M., Suski, K. J., Rosenfeld, D., Cazorla, A., DeMott, P. J., Sullivan, R.C.,  
752 White, A.B., Ralph, F.M., Minnis, P., Comstock, J.M., Tomlinson, J.M.: Dust and  
753 biological aerosols from the Sahara and Asia influence precipitation in the western  
754 U.S., *Science*, 339, 1572–1578, 2013.

755 DeLeon-Rodriguez, N., Latham, T.L., Rodriguez-R, L.M., Barazesh, J.M., Anderson,  
756 B.E., Beyersdorf, A.J, Ziemba, L.D., Bergin, M., Nenes, A., and Konstantinidis,  
757 K.T.: Microbiome of the upper troposphere: Species composition and prevalence,  
758 effects of tropical storms, and atmospheric implications, *Proc. Natl. Acad. Sci.*  
759 *USA*, 110, 2575–2580, 2013.

760 Delort, A.M., Vařtilingom, M., Amato, P., Sancelme, M., Parazols, M., Mailhot, G., Laj,  
761 P., and Deguillaume, L.: A short overview of the microbial population in clouds:  
762 Potential roles in atmospheric chemistry and nucleation processes, *Atmos. Res.*, 98,  
763 249–260, 2010.

764 Edgar, R.C.: UPARSE: highly accurate OTU sequences from microbial amplicon reads,  
765 Nature methods, 10, 996–998, 2013.

766 Fahlgren, C., Hagström, Å., Nilsson, D., and Zweifel, U.L.: Annual variations in the  
767 diversity, viability, and origin of airborne bacteria, Appl. Environ. Microbiol., 76,  
768 3015–3025, 2010.

769 Fierer, N., and Lennon, J.T.: The generation and maintenance of diversity in microbial  
770 communities, American J. Botany, 98, 439–448, 2011.

771 Fu, P., Zhuang, G., Sun, Y., Wang, Q., Chen, J., Ren, L. Yang, F., Wang, Z., Pan, X., Li,  
772 X., Kawamura, K.: Molecular markers of biomass burning, fungal spores and  
773 biogenic SOA in the Taklimakan desert aerosols, Atmos. Environ., 130, 64-73,  
774 2016.

775 Fürnkranz, M., Wanek, W., Richter, A., Abell, G., Rasche, F., and Sessitsch, A.:  
776 Nitrogen fixation by phyllosphere bacteria associated with higher plants and their  
777 colonizing epiphytes of a tropical lowland rainforest of Costa Rica, ISME J., 2 5,  
778 561–570, 2008.

779 Gorbushina, A.A., Kort, R., Schulte, A., Lazarus, D., Schnetger, B., Brumsack, H.J.,  
780 Broughton, W.J., and Favet, J.: Life in Darwin's dust: intercontinental transport and  
781 survival of microbes in the nineteenth century, Environ. Microbiol., 9, 2911–2922,  
782 2007.

783 Griffin, D.W.: Atmospheric movement of microorganisms in clouds of desert dust and  
784 implications for human health, Clin. Microbiol. Rev., 20, 459–477, 2007.

785 Guan, X., Huang, J., Zhang, Y., Xie, Y., and Liu, J.: The relationship between  
786 anthropogenic dust and population over global semi-arid regions, Atmos. Chem.

787 Phys., 16, 5159-5169, 2016.

788 Hallet, J., Mossop, S.C.: Production of secondary ice particles during the riming process,  
789 Nature, 249, 26–28, 1974.

790 Hara, K., and Zhang, D.: Bacterial abundance and viability in long-range transported  
791 dust, Atmos. Environ., 47, 20–25, 2012.

792 Hara, K., Maki, T., Kakikawa, M., Kobayashi, F., and Matsuki, A.: Effects of different  
793 temperature treatments on biological ice, Atmos. Environ., 140, 415-419, 2016a.

794 Hara, K., Maki, T., Kobayashi, F., Kakikawa, M., Wada, M., and Matsuki, A.:  
795 Variations of ice nuclei concentration induced by rain and snowfall within a local  
796 forested site in Japan, Atmos. Environ., 127, 1–5, 2016b.

797 Hoose, C., Möhler, O.: Heterogeneous ice nucleation on atmospheric aerosols: a review  
798 of results from laboratory experiments, Atmos. Chem. Phys., 12, 9817–9854. 2012.

799 Hua, N.P., Kobayashi, F., Iwasaka, Y., Shi, G.Y., and Naganuma, T.: Detailed  
800 identification of desert-originated bacteria carried by Asian dust storms to Japan,  
801 Aerobiologia, 23, 291–298, 2007.

802 Huang, J.P., Liu, J.J., Chen, B., and Nasiri, S.L.: Detection of anthropogenic dust using  
803 CALIPSO lidar measurements, Atmos. Chem. Phys., 15, 11653-11665, 2015a.

804 Huang, Z., Huang, J., Hayasaka, T., Wang, S., Zhou, T., and Jin, H.: Short-cut transport  
805 path for Asian dust directly to the Arctic: a case study, Environ. Res. Lett., 10,  
806 114018, 2015b.

807 Ichinose, T., Nishikawa, M., Takano, H., Sera, N., Sadakane, K., Mori, I., Yanagisawa,  
808 R., Oda, T., Tamura, H., Hiyoshi, K., Quan, H., Tomura, S., and Shibamoto, T.:  
809 Pulmonary toxicity induced by intratracheal instillation of Asian yellow dust

810 (Kosa) in mice, *Regul. Toxicol. Pharm.*, 20, 48-56, 2005.

811 Iwasaka, Y., Shi, G.Y., Yamada, M., Kobayashi, F., Kakikawa, M., Maki, T., Chen, B.,  
812 Tobo, Y., and Hong, C.: Mixture of Kosa (Asian dust) and bioaerosols detected in  
813 the atmosphere over the Kosa particles source regions with balloon-borne  
814 measurements: possibility of long-range transport, *Air. Qual. Atmos. Health.*, 2,  
815 29–38, 2009.

816 Iwasaka, Y., Yamato, M., Imasu, R., and Ono, A.: The transport of Asia dust (KOSA)  
817 particles; importance of weak KOSA events on the geochemical cycle of soil  
818 particles, *Tellus*, 40B, 494–503, 1988.

819 Jaenicke, R.: Abundance of cellular material and proteins in the atmosphere, *Science*,  
820 308, 73, 2005.

821 Jeon, E.M., Kim, H.J., Jung, K., Kim, J.H., Kim, M.Y., Kim, Y.P., and Ka, J.O.: Impact  
822 of Asian dust events on airborne bacterial community assessed by molecular  
823 analyses, *Atmos. Environ.*, 45, 4313–4321, 2011.

824 Joly, M., Attard, E., Sancelme, M., Deguillaume, L., Guilbaud, C., Morris, C.E. Amato,  
825 P., and Delort, A.M.: Ice nucleation activity of bacteria isolated from cloud water,  
826 *Atmos. Environ.*, 70, 392–400, 2013.

827 Khan, Z., and Doty, S.L.: Characterization of bacterial endophytes of sweet potato  
828 plants, *Plant Soil*, 322, 197–207, 2009.

829 Kobayashi, F., Iwata, K., Maki, T., Kakikawa, M., Higashi, T., Yamada, M., Ichinose, T.,  
830 and Iwasaka, Y.: Evaluation of the toxicity of a Kosa (Asian duststorm) event from  
831 view of food poisoning: observation of Kosa cloud behavior and real-time PCR  
832 analyses of Kosa bioaerosols during May 2011 in Kanazawa, Japan, *Air Qual.*

833 Atmos. Health, 9, 3–14, 2015.

834 Kourtev, P.S., Hill, K.A., Shepson, P.B., and Konopka A.: Atmospheric cloud water  
835 contains a diverse bacterial community, Atmos. Environ., 45, 5399–5405, 2011.

836 Lang-Yona, N., Lehahn, Y., Herut, B., Burshtein, N., and Rudich, Y.: Marine aerosol as  
837 a possible source for endotoxins in coastal areas, Sci. Total Environ., 499, 311–318,  
838 2014.

839 Latifi, A., Ruiz, M., and Zhang, C.C.: Oxidative stress in cyanobacteria, FEMS  
840 Microbiol. Rev., 33, 258–278, 2009.

841 Liu, B., Ichinose, T., He, M., Kobayashi, N., Maki, T., Yoshida, S., Yoshida, Y.,  
842 Arashidani, K., Nishikawa, M., Takano, H., Sun, G., and Shibamoto, T.: Lung  
843 inflammation by fungus, *Bjerkandera adusta* isolated from Asian sand dust (ASD)  
844 aerosol and enhancement of ovalbumin -induced lung eosinophilia by ASD and the  
845 fungus in mice, Allergy Asthma Clin. Immunol., 10, 10, 2014.

846 Maki, T., Kurosaki, Y., Onishi, K., Lee, K.C., Pointing, S.B., Jugder, D., Yamanaka, N.,  
847 Hasegawa, H., and Shinoda, M.: Variations in the structure of airborne bacterial  
848 communities in Tsogt-Ovoo of Gobi Desert area during dust events, Air Qual.  
849 Atmos. Health., 2016. DOI: 10.1007/s11869-016-0430-3

850 Maki, T., Susuki, S., Kobayashi, F., Kakikawa, M., Tobo, Y., Yamada, M., Higashi, T.,  
851 Matsuki, A., Hong, C., Hasegawa, H., and Iwasaka, Y.: Phylogenetic analysis of  
852 atmospheric halotolerant bacterial communities at high altitude in an Asian dust  
853 (KOSA) arrival region, Suzu City, Sci. Total Environ., 408, 4556–4562, 2010.

854 Maki, T., Hara, K., Kobayashi, F., Kurosaki, Y., Kakikawa, M., Matsuki, A., Bin, C., Shi,  
855 G., Hasegawa, H., and Iwasaka, Y.: Vertical distribution of airborne bacterial

856 communities in an Asian-dust downwind area, Noto Peninsula, Atmos. Environ.,  
857 119, 282–293, 2015.

858 Maki, T., Kakikawa, M., Kobayashi, F., Yamada, M., Matsuki, A., Hasegawa, H., and  
859 Iwasaka, Y.: Assessment of composition and origin of airborne bacteria in the free  
860 troposphere over Japan, Atmos. Environ., 74, 73–82, 2013.

861 Maki, T., Susuki, S., Kobayashi, F., Kakikawa, M., Yamada, M., Higashi, T., Chen, B.,  
862 Shi, G., Hong, C., Tobo, Y., Hasegawa, H., Ueda, K., and Iwasaka, Y.:  
863 Phylogenetic diversity and vertical distribution of a halobacterial community in the  
864 atmosphere of an Asian dust (KOSA) source region, Dunhuang City, Air. Qual.  
865 Atmos. Health, 1, 81–89, 2008.

866 Maki, T., Puspitasari, F., Hara, K., Yamada, M., Kobayashi, F., Hasegawa, H., and  
867 Iwasaka, Y.: Variations in the structure of airborne bacterial communities in a  
868 downwind area during an Asian dust (Kosa) event, Sci. Total Environ., 488–489,  
869 75–84, 2014.

870 Mantelin, S., Fischer-Le Saux, M., Zakhia, F., Béna, G., Bonneau, S., Jeder, H., Lajudie,  
871 P., and Cleyet-Marel, J.C.: Emended description of the genus *Phyllobacterium* and  
872 description of four novel species associated with plant roots: *Phyllobacterium*  
873 *bourgognense* sp. nov., *Phyllobacterium ifriqiyense* sp. nov., *Phyllobacterium*  
874 *leguminum* sp. nov. and *Phyllobacterium brassicacearum* sp. nov., Int. J. Syst. Evol.  
875 Microbiol., 56, 827–839, 2006.

876 Matulova, M., Husarova, S., Capek, P., Sancelme, M., and Delort, A.M.:  
877 Biotransformation of various saccharides and production of exopolymeric  
878 substances by cloud-borne *Bacillus* sp. 3B6, Environ. Sci. Technol., 48,

879 14238–14247, 2014.

880 Mazar, Y., Cytryn, E., Erel, Y., and Rudich, Y.: Effect of dust storms on the atmospheric  
881 microbiome in the Eastern Mediterranean, *Environ. Sci. Technol.*, 50, 4194–4202,  
882 2016.

883 McDonald, D., Price, M.N., Goodrich, J., Nawrocki, E.P., DeSantis, T.Z., Probst, A.,  
884 Andersen, G.L., Knight, R., and Hugenholtz, P.: An improved Greengenes  
885 taxonomy with explicit ranks for ecological and evolutionary analyses of bacteria  
886 and archaea, *ISME J.*, 6, 610–618, 2012.

887 Möhler, O., DeMott, P.J., Vali, G., and Levin, Z.: Microbiology and atmospheric  
888 processes: the role of biological particles in cloud physics, *Biogeosciences*, 4,  
889 1059–1071, 2007.

890 Morris, C.E., Georgakopoulos, D.G., Sands, D.C.: Ice nucleation active bacteria and  
891 their potential role in precipitation, *J. Phy. IV France*, 121, 87–103. 2004.

892 Morris, C.E., Sands, D.C., Vinatzer, B.A., Glaux, C., Guilbaud, C., Buffière, A., Yan, S.,  
893 Dominguez, H., and Thompson, B.M.: The life history of the plant pathogen  
894 *Pseudomonas syringae* is linked to the water cycle, *ISME J.*, 2, 321–334, 2008.

895 Morris, C.E., Sands, D.C., Bardin, M., Jaenicke, R., Vogel, B., Leyronas, C., Ariya, P.A.,  
896 Psenner, R.: Microbiology and atmospheric processes: research challenges  
897 concerning the impact of airborne micro-organisms on the atmosphere and climate,  
898 *Biogeoscience*, 8, 17–25. 2011.

899 Mortazavi, R., Attiya, S., and Ariya, P.A.: Arctic microbial and next-generation  
900 sequencing approach for bacteria in snow and frost flowers: selected identification,  
901 abundance and freezing nucleation, *Atmos. Chem. Phys.*, 15, 6183–6204, 2015.



902 Mostajir, B., Dolan, J.R., and Rassoulzadegan, F.: A simple method for the  
903 quantification of a class of labile marine pico- and nano-sized detritus: DAPI  
904 Yellow Particles (DYP), *Aquat. Microb. Ecol.*, 9, 259–266, 1995.

905 Murray, B.J., O’Sullivan, D., Atkinson, J.D., Webb, M.E.: Ice nucleation by particles  
906 immersed in supercooled cloud droplets, *Chem. Soc. Rev.*, 41, 6519–6554. 2012.

907 Newton, R.J., Jones, S.E., Eiler, A., McMahon, K.D., and Bertilsson, S.: A guide to the  
908 natural history of freshwater lake bacteria, *Microbiol. Mol. Biol. Rev.*, 75, 14–49,  
909 2011.

910 Nicholson, W.L., Munakata, N., Horneck, G., Melosh, H.J., and Setlow, P.: Resistance  
911 of *Bacillus* endospores to extreme terrestrial and extraterrestrial environments,  
912 *Microbiol. Mol. Biol. Rev.*, 64, 548-572, 2000.

913 Nold, S.C., and Zwart, G.: Patterns and governing forces in aquatic microbial  
914 communities, *Aquat. Ecol.*, 32:17–35, 1998.

915 Pointing, S.B., and Belnap, J.: Disturbance to desert soil ecosystems contributes to  
916 dust-mediated impacts at regional scales, *Biodivers. Conserv.*, 24, 1659–1667,  
917 2014.

918 Polymenakou, P.N., Mandalakis, M., Stephanou, E.G., and Tselepides, A.: Particle size  
919 distribution of airborne microorganisms and pathogens during an intense African  
920 dust event in the Eastern Mediterranean, *Environ. Health Perspect.*, 116, 292–296,  
921 2008.

922 Pratt, K.A., DeMott, P.J., French, J.R., Wang, Z., Westphal, D.L., Heymsfield, A.J.,  
923 Twohy, C.H., Prenni, A.J., and Prather, K.A.: In situ detection of biological  
924 particles in cloud ice-crystals, *Nature Geoscience*, 2, 398–401, 2009.

925 Puspitasari, F, Maki, T, Shi, G, Bin, C, Kobayashi, F, Hasegawa, H., and Iwasaka, Y.:  
926 Phylogenetic analysis of bacterial species compositions in sand dunes and dust  
927 aerosol in an Asian dust source area, the Taklimakan Desert, *Air Qual. Atmos.*  
928 *Health.*, 9: 631–644, 2015.

929 Redford, A.J., Bowers, R.M., Knight, R., Linhart, Y., and Fierer, N.: The ecology of the  
930 phyllosphere: geographic and phylogenetic variability in the distribution of  
931 bacteria on tree leaves, *Environ. Microbiol.*, 12: 2885–2893, 2010.

932 Rodó, X., Ballester, J., Cayan, D., Melish, M.E., Nakamura, Y., Uehara, R., and Burns,  
933 J.C.: Association of Kawasaki disease with tropospheric wind patterns, *Scientific*  
934 *Reports* 1, 152, 2011.

935 Russell, W.C., Newman, C., and Williamson, D.H.: A simple cytochemical technique for  
936 demonstration of DNA in cells infected with mycoplasmas and viruses, *Nature*,  
937 253, 461–462, 1974.

938 Schloss, P.D., Westcott, S.L., Ryabin, T., Hall, J.R., Hartmann, M., Hollister, E.B.,  
939 Lesniewski, R.A., Oakley, B.B., Parks, D.H., Robinson, C.J., Sahl, J.W., Stres,  
940 B., Thallinger, G.G., Horn, D.J.V., and Weber, CF.: Introducing mothur:  
941 open-source, platform-independent, community-supported software for  
942 describing and comparing microbial communities, *Appl. Environ. Microbiol.*,  
943 75:7537–7541, 2009.

944 Sheridan, P.P., Miteva, V.I., and Brenchley, J.E.: Phylogenetic analysis of anaerobic  
945 psychrophilic enrichment cultures obtained from a Greenland glacier ice core,  
946 *Appl. Environl. Microbiol.*, 69, 2153–2160, 2003.

947 Smith, D.J., Timonen, H.J., Jaffe, D.A., Griffin, D.W., Birmele, M.N., Warda, P.P.D.,

948 and Roberts, M.S.: Intercontinental dispersal of bacteria and archaea by  
949 transpacific winds, *Appl. Environl. Microbiol.*, 79, 1134–1139, 2013.

950 Sugimoto, N., Huang, Z., Nishizawa, T., Matsui, I., and Tatarov, B.: Fluorescence from  
951 atmospheric aerosols observed with a multi-channel lidar spectrometer, *Optics*  
952 *Express*, 20, 20800–20807, 2012.

953 Tanaka, D., Tokuyama, Y., Terada, Y., Kunimochi, K., Mizumaki, C., Tamura, S.,  
954 Wakabayashi, M., Aoki, K., Shimada, W., Tanaka, H., and Nakamura, S.: Bacterial  
955 communities in Asian dust-containing snow layers on Mt. Tateyama, Japan, *Bull.*  
956 *Glaciological. Res.*, 29, 31–39, 2011.

957 Temkiv, T.Š., Kai F., Bjarne, M.H., Niels, W.N., and Ulrich, G.K.: The microbial  
958 diversity of a storm cloud as assessed by hailstones, *FEMS Microbial. Ecol.*, 81,  
959 684–695, 2012.

960 Turnbaugh, P.J., Biomolecules, S.B.D., and Roscoff, F.: Environmental and gut  
961 bacteroidetes: the food connection, *Front Microbiol.*, 2, 93–111, 2011.

962 Twohy, C.H., McMeeking, G.R., DeMott, P.J., McCluskey, C.S., Hill, T.C., Burrows,  
963 S.M., G.R. Kulkarni, M. Tanarhte, and D.N. Kafle, and Toohey, D.W.: Abundance  
964 of fluorescent biological aerosol particles at temperatures conducive to the  
965 formation of mixed-phase and cirrus clouds, *Atmos. Chem. Phys.*, 16, 8205–8225,  
966 2016.

967 Vařtilingom, M., Attard, E., Gaiani, N., Sancelme, M., Deguillaume, L., Flossmann, A.I.,  
968 Amato, P., and Delort, A.M.: Long-term features of cloud microbiology at the puy  
969 de Dôme (France), *Atmos. Environ.*, 56, 88–100, 2012.

970 Watanabe, K., Yachi, C., Nishibe, M., Michigami, S., Saito, Y., Eda, N., Yamazaki, N.,

971 and Hirai, T.: Measurements of atmospheric hydroperoxides over a rural site in  
972 central Japan during summers using a helicopter, *Atmos. Environ.*, 146, 174–182,  
973 2016.

974 Wang, Q., Garrity, G.M., Tiedje, J.M., and Cole, J.R.: Naive Bayesian classifier for  
975 rapid assignment of rRNA sequences into the new bacterial taxonomy, *Appl.*  
976 *Environ. Microbiol.*, 73, 5261–5267, 2007.

977 Wei, K., Zou, Z., Zheng, Y., Li, J., Shen, F., Wu, C. Y., Hua, M., and Yao, M.: Ambient  
978 bioaerosol particle dynamics observed during haze and sunny days in Beijing,  
979 *Sci. Total Environ.*, 550, 751–759, 2016.

980 Woo, A.C., Brar, M.S., Chan, Y., Lau, M.C., Leung, F.C., Scott, J.A., Vrijmoed L.P.,  
981 Zawar-Reza P., and Pointing S.B.: Temporal variation in airborne microbial  
982 populations and microbially-derived allergens in a tropical urban landscape, *Atmos.*  
983 *Environ.*, 74, 291-300, 2013.

984

985 **Figure Legends**

986

987 Fig. 1. Sampling location (a) and helicopter flight routes during the sampling periods on  
988 March 19, 2013, and April 28, 2013 (b); the 23rd, 24th, 25th, and 29th of March 2014  
989 (c); and the 16th, 17th, 20th, and 21st of March 2015 (d).

990

991 Fig. 2. LIDAR observation of the depolarization ratio in Toyama city as well as vertical  
992 changes in temperature, relative humidity, and potential temperature, and vertical  
993 distributions of concentrations of OPC-counted particles and DAPI-stained particles  
994 from the four sampling events on March 19, 2013 (a); April 28, 2013 (b); March 28,  
995 2014 (c); and March 20, 2015 (d). The red circles in the LIDAR images indicate that the  
996 sampling air included dust mineral particles (solid line) or that dust-event influences are  
997 absent at the altitudes on the sampling time (dotted line). OPC-counted particles were  
998 categorized according to diameter sizes of 0.3–0.5  $\mu\text{m}$  (closed squares), 0.5–0.7  $\mu\text{m}$   
999 (closed triangles), 0.7–1.0  $\mu\text{m}$  (closed circles), 1.0–2.0  $\mu\text{m}$  (closed diamonds), 2.0–5.0  
1000  $\mu\text{m}$  (crosses), and >5.0  $\mu\text{m}$  (open circles). DAPI-stained particles were classified into  
1001 microbial particles (blue bars), white particles (white bars), yellow fluorescent particles  
1002 (yellow bars), and black carbon (gray bars).

1003

1004 Fig. 3. Trajectories 3 days ago of aerosols that arrived at 2,500 m (blue-type lines) and  
1005 1,200 m (red-type lines) in Hakui, Japan, every hour for 5 h before the completion of  
1006 sampling time at the four dates; March 19, 2013; April 28, 2013; March 28, 2014; and  
1007 March 20, 2015.

1008

1009 Fig. 4. (a) LIDAR observation of the depolarization ratio in Toyama city and  
1010 concentrations of OPC-counted particles and DAPI-stained particles during no-dust  
1011 days from 0:00 UTC on March 23 to 0:00 UTC on March 30, 2014. The red circles with  
1012 dotted lines in the LIDAR images indicate dust-event influences are absent at the  
1013 altitudes on the sampling time. (b) OPC-counted particles were categorized according to  
1014 diameter sizes of 0.3–0.5  $\mu\text{m}$  (closed squares), 0.5–0.7  $\mu\text{m}$  (closed triangles), 0.7–1.0  
1015  $\mu\text{m}$  (closed circles), 1.0–2.0  $\mu\text{m}$  (closed diamonds), 2.0–5.0  $\mu\text{m}$  (crosses), and >5.0  $\mu\text{m}$   
1016 (open circles). DAPI-stained particles were classified into microbial particles (blue bars),  
1017 white particles (white bars), yellow particles (yellow bars), and black particles (gray  
1018 bars). (c) Trajectories 3 days ago of aerosols that arrived at 2,500 m (blue-type lines)  
1019 and 1,200 m (red-type lines) in Hakui, Japan, every hour for 5 h before the completion  
1020 of sampling time during sampling periods on the 23rd, 24th, 25th, 28th, and 29th of  
1021 March 2014.

1022

1023 Fig. 5. (a) LIDAR observation of the depolarization ratio in Toyama city and  
1024 concentrations of OPC-counted particles and DAPI-stained particles during dust event  
1025 days from 0:00 UTC on March 16 to 0:00 UTC on March 23, 2015. The red circles with  
1026 solid lines in the LIDAR images indicate that the sampling air included dust mineral  
1027 particles. (b) OPC-counted particles were categorized based on diameter sizes of  
1028 0.3–0.5  $\mu\text{m}$  (closed squares), 0.5–0.7  $\mu\text{m}$  (closed triangles), 0.7–1.0  $\mu\text{m}$  (closed circles),  
1029 1.0–2.0  $\mu\text{m}$  (closed diamonds), 2.0–5.0  $\mu\text{m}$  (crosses), and >5.0  $\mu\text{m}$  (open circles).  
1030 DAPI-stained particles were classified into microbial particles (blue bars), white

1031 particles (white bars), yellow particles (yellow bars), and black particles (gray bars). (c)  
1032 Trajectories 3 days ago of aerosols that arrived at 2,500 m (blue-type lines) and 1,200 m  
1033 (red-type lines) in Hakui, Japan, every hour for 5 h before the completion of sampling  
1034 time during sampling periods on the 16th, 17th, 20th, and 21st of March 2015.

1035

1036 Fig. 6. Vertical variations in bacterial compositions at (a) the class level and (b) the  
1037 family level of the partial sequences obtained in the MiSeq sequencing database (ca.  
1038 400 bp) obtained from air samples collected at different altitudes over the Noto  
1039 Peninsula at dust-event days (March 19, 2013; March 20, 2015) and non-dust-event  
1040 days (March 19, 2013; March 20, 2015).

1041

1042 Fig. 7. Changes in bacterial compositions at (a) the class level and (b) the family level  
1043 of the partial sequences obtained in the MiSeq sequencing database (ca. 400 bp) from  
1044 air samples collected at altitudes of 1,200 m (except for the sample collected at 500 m  
1045 on March 20, 2015) over the Noto Peninsula during dust-event days from the 16th to the  
1046 23rd of March 2015 and during non-dust-event days from the 23rd to the 29th of March  
1047 2014.

1048

1049 Fig. 8. Comparison of the bacterial compositions among all air samples collected over  
1050 the Noto Peninsula. (a) Box plots of Chao 1 and Shannon analyses indicating the  
1051 bacterial diversity observed in dust samples and non-dust samples. Species were binned  
1052 at the 97 % sequence similarity level. (b) NMDS of the pairwise Bray-Curtis distance  
1053 matrix displaying clustering by all the air samples. Red indicates the samples that were

1054 collected during dust-events and blue indicates those collected during non-dust-events  
1055 as determined by meteorological data. Circle indicates that the sample contained dust  
1056 particles as identified via microscopic observation, and triangle indicates that dust  
1057 particles were absent from the sample. The confidence ellipses are based on a  
1058 multivariate t-distribution, and represents the 95 % confidence interval of the  
1059 occurrence of dust vs. non-dust events when the samples were collected.
